# Supplementary material for: Patient Perspectives of Living with Coeliac Disease and Accessing Dietetic Services in Rural Australia: A Qualitative Study
Source: MDPI journal article supplement (doi:10.3390/nu13062074), 2021-06-17
Supplement: s1 [file s1]

## Supplementary File: Semi-structured interview questions

---

**The following questions are in relation to the research study 'Retrospective evaluation of coeliac disease cases referred to a rural dietetics outpatient clinic' study**

---

The following information is to be recorded as demographic data at the start of the interview.

**Confirm and record verbal consent** to participate in interview:

Yes / No, if No, do not continue interview with interview.

Gender: Male/ Female

Age:

How many years since coeliac disease diagnosis?

How many times have you seen a dietitian regarding the management of your coeliac disease?

---

Semi-structured interview questions on following page.

\*Adapted from Dorn et al (2010). The development and validation of a new coeliac disease quality of life survey (CD-QOL). *Alimentary Pharmacology and Therapeutics* 31, 666-675.
